# Supplementary material
Source: PubMed Central journal article supplement (PMC3558816)

Supplemental Figure 1

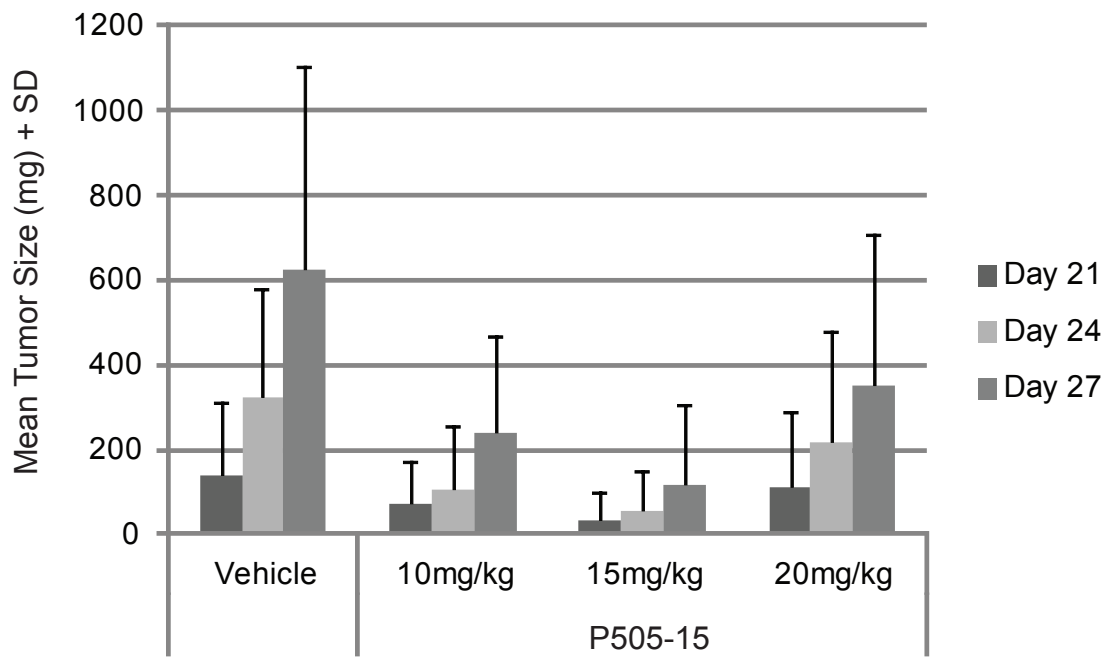

Supplement: supp_112.200832_JPET200832_sup_figure.pdf [file supp_112.200832_JPET200832_sup_figure.pdf]
